# Supplementary material
Source: Research Square preprint supplement (doi:10.21203/rs.3.rs-9597215/v1)
Supplement: Supplementary file 1 [file 7e37cdc351cc223050f6e26a.docx]

**Trends in Respiratory Failure–Associated Mortality Among Older Adults With Neurodegenerative Diseases in the United States (1999-2024)**

**Supplemental Table 1:** Overall and sex-stratified trends in respiratory failure and neurodegenerative disorders - related mortality, shown as age-adjusted mortality rates per 100,000 among adults aged ≥65 in the United States, 1999–2024

**Supplemental Table 2:**  Census region–stratified trends in respiratory failure and neurodegenerative disorders - related mortality, shown as age-adjusted mortality rates per 100,000 among adults aged ≥65 in the United States, 1999–2024

**Supplemental Table 3:** Age-stratified trends in respiratory failure and neurodegenerative disorders - related mortality, shown as age-adjusted mortality rates per 100,000 among adults aged ≥65 in the United States, 1999–2024

**Supplemental Table 4:** Urbanization-stratified trends in respiratory failure and neurodegenerative disorders - related mortality, shown as age-adjusted mortality rates per 100,000 among adults aged ≥65 in the United States, 1999–2024

**Supplemental Table 5:** Race-stratified trends in respiratory failure and neurodegenerative disorders - related mortality, shown as age-adjusted mortality rates per 100,000 among adults aged ≥65 in the United States, 1999–2024

**Supplemental Table 6:** State- trends in respiratory failure and neurodegenerative disorders - related mortality, shown as age-adjusted mortality rates per 100,000 among adults aged ≥65 in the United States, 1999–2024

**Supplemental Table 7:** Percentage distribution of place of death due to respiratory failure and neurodegenerative disorders - related mortality, in the United States (1999–2024), with mortality highlighted.

**Supplemental Table 8**: Characteristics trends in respiratory failure and neurodegenerative disorders - related mortality,, shown as age-adjusted mortality rates per 100,000 among adults aged ≥65 in the United States, 1999–2024

**Supplemental Table 1:** Overall and sex-stratified trends in respiratory failure and neurodegenerative disorders - related mortality, shown as age-adjusted mortality rates per 100,000 among adults aged ≥65 in the United States, 1999–2024

| Overall and sex-stratified trends in respiratory failure and neurodegenerative disorders - related mortality, shown as age-adjusted mortality rates per 100,000 among adults aged ≥65 in the United States, 1999–2024 | | | |
| --- | --- | --- | --- |
| Age-Adjusted Mortality Rate (95% CI) | | | |
| **YEAR** | **OVERALL** | **FEMALE** | **MALE** |
| 1999 | 9.31 (8.98–9.63) | 7.87 (7.50–8.25) | 11.83 (11.22–12.44) |
| 2000 | 9.22 (8.90–9.54) | 7.67 (7.31–8.04) | 11.74 (11.14–12.34) |
| 2001 | 9.51 (9.19–9.83) | 8.14 (7.77–8.52) | 11.81 (11.21–12.40) |
| 2002 | 9.75 (9.42–10.07) | 8.36 (7.98–8.74) | 11.90 (11.31–12.50) |
| 2003 | 10.09 (9.76–10.42) | 8.72 (8.34–9.11) | 12.20 (11.61–12.80) |
| 2004 | 10.32 (9.99–10.65) | 8.85 (8.47–9.23) | 12.54 (11.94–13.14) |
| 2005 | 10.72 (10.38–11.05) | 9.34 (8.95–9.73) | 12.66 (12.06–13.25) |
| 2006 | 11.03 (10.70–11.37) | 9.33 (8.94–9.72) | 13.55 (12.95–14.16) |
| 2007 | 11.25 (10.92–11.59) | 10.08 (9.68–10.49) | 12.97 (12.38–13.55) |
| 2008 | 12.81 (12.46–13.16) | 11.18 (10.76–11.60) | 15.25 (14.62–15.88) |
| 2009 | 12.03 (11.70–12.37) | 10.55 (10.14–10.95) | 14.24 (13.64–14.84) |
| 2010 | 13.20 (12.84–13.55) | 11.70 (11.27–12.12) | 15.31 (14.70–15.93) |
| 2011 | 13.08 (12.73–13.43) | 11.43 (11.02–11.84) | 15.45 (14.84–16.05) |
| 2012 | 12.66 (12.33–13.00) | 10.83 (10.43–11.23) | 15.28 (14.68–15.87) |
| 2013 | 13.35 (13.01–13.69) | 11.35 (10.95–11.76) | 16.23 (15.63–16.83) |
| 2014 | 13.88 (13.53–14.22) | 12.13 (11.71–12.55) | 16.34 (15.75–16.94) |
| 2015 | 16.44 (16.07–16.81) | 14.41 (13.97–14.86) | 19.06 (18.43–19.69) |
| 2016 | 17.41 (17.03–17.79) | 15.66 (15.20–16.12) | 19.62 (18.99–20.26) |
| 2017 | 19.04 (18.65–19.43) | 17.28 (16.80–17.76) | 21.29 (20.64–21.95) |
| 2018 | 19.88 (19.49–20.28) | 17.96 (17.47–18.44) | 22.40 (21.75–23.06) |
| 2019 | 18.49 (18.11–18.86) | 16.48 (16.02–16.94) | 21.00 (20.37–21.63) |
| 2020 | 20.57 (20.18–20.96) | 18.84 (18.36–19.33) | 22.67 (22.03–23.32) |
| 2021 | 20.70 (20.30–21.11) | 18.94 (18.45–19.45) | 22.91 (22.25–23.58) |
| 2022 | 20.66 (20.27–21.05) | 18.74 (18.27–19.23) | 23.23 (22.58–23.89) |
| 2023 | 21.19 (20.80–21.59) | 19.46 (18.97–19.95) | 23.21 (22.57–23.86) |
| 2024 | 22.04 (21.65–22.44) | 20.50 (20.01–21.00) | 23.72 (23.09–24.36) |

*Abbreviations: CI, Confidence Interval*

**Supplemental Table 2:**  Census region–stratified trends in respiratory failure and neurodegenerative disorders - related mortality, shown as age-adjusted mortality rates per 100,000 among adults aged ≥65 in the United States, 1999–2024

| Census region–stratified trends in respiratory failure and neurodegenerative disorders - related mortality, shown as age-adjusted mortality rates per 100,000 among adults aged ≥65 in the United States, 1999–2024 | | | | |
| --- | --- | --- | --- | --- |
| Age-Adjusted Mortality Rate (95% CI) | | | | |
| **Year** | **Northwest** | **Midwest** | **South** | **West** |
| 1999 | 8.7 (8.03–9.37) | 6.48 (5.93–7.03) | 9.04 (8.5–9.57) | 14.15 (13.25–15.06) |
| 2000 | 8.94 (8.26–9.62) | 7.07 (6.5–7.63) | 9.45 (8.9–10) | 11.73 (10.92–12.55) |
| 2001 | 9.27 (8.58–9.95) | 7.39 (6.81–7.97) | 9.82 (9.27–10.38) | 11.99 (11.18–12.8) |
| 2002 | 9.44 (8.76–10.13) | 7.14 (6.57–7.7) | 9.86 (9.3–10.41) | 12.99 (12.15–13.83) |
| 2003 | 8.96 (8.29–9.63) | 7.38 (6.81–7.96) | 10.23 (9.67–10.79) | 14.13 (13.27–15) |
| 2004 | 9.2 (8.52–9.87) | 7.53 (6.95–8.1) | 10.99 (10.41–11.57) | 13.94 (13.09–14.79) |
| 2005 | 10.15 (9.45–10.86) | 8.26 (7.66–8.86) | 10.76 (10.19–11.32) | 14.24 (13.39–15.09) |
| 2006 | 10.31 (9.61–11.02) | 8.67 (8.06–9.28) | 10.71 (10.16–11.27) | 15.05 (14.18–15.91) |
| 2007 | 10.62 (9.9–11.33) | 8 (7.42–8.58) | 11.29 (10.73–11.86) | 15.78 (14.91–16.65) |
| 2008 | 11.82 (11.07–12.57) | 9.39 (8.77–10.02) | 12.17 (11.59–12.75) | 18.94 (18–19.88) |
| 2009 | 10.98 (10.26–11.7) | 8.74 (8.14–9.35) | 11.22 (10.67–11.77) | 18.17 (17.26–19.08) |
| 2010 | 11.31 (10.58–12.04) | 9.24 (8.62–9.85) | 13.49 (12.89–14.09) | 19.21 (18.28–20.14) |
| 2011 | 12.22 (11.47–12.97) | 9.8 (9.17–10.43) | 12.29 (11.73–12.85) | 19.14 (18.23–20.05) |
| 2012 | 11.3 (10.58–12.01) | 9.29 (8.68–9.9) | 11.76 (11.21–12.3) | 19.15 (18.25–20.04) |
| 2013 | 11.99 (11.25–12.72) | 10.15 (9.51–10.78) | 13.13 (12.57–13.7) | 18.66 (17.79–19.54) |
| 2014 | 12.7 (11.95–13.45) | 10.5 (9.86–11.14) | 13.87 (13.29–14.44) | 18.69 (17.83–19.55) |
| 2015 | 13.45 (12.68–14.21) | 12.15 (11.47–12.82) | 17.89 (17.25–18.53) | 21.08 (20.18–21.98) |
| 2016 | 13.82 (13.05–14.59) | 13.29 (12.59–14) | 18.34 (17.7–18.98) | 23.32 (22.39–24.25) |
| 2017 | 15.63 (14.83–16.44) | 13.87 (13.16–14.58) | 20.43 (19.76–21.1) | 25.1 (24.14–26.05) |
| 2018 | 16.74 (15.91–17.56) | 14.4 (13.68–15.11) | 21.43 (20.76–22.1) | 25.73 (24.78–26.68) |
| 2019 | 15.39 (14.6–16.17) | 14.05 (13.35–14.75) | 18.9 (18.28–19.52) | 24.91 (23.99–25.84) |
| 2020 | 16.07 (15.27–16.86) | 15.17 (14.45–15.9) | 21.81 (21.15–22.47) | 27.65 (26.69–28.62) |
| 2021 | 15.16 (14.39–15.97) | 15.72 (14.97–16.49) | 21.44 (20.78–22.13) | 29.29 (28.28–30.33) |
| 2022 | 15.39 (14.63–16.18) | 16 (15.26–16.75) | 20.74 (20.11–21.39) | 29.78 (28.8–30.78) |
| 2023 | 16.42 (15.63–17.23) | 17.83 (17.06–18.63) | 22.26 (21.61–22.94) | 26.68 (25.75–27.63) |
|  | 17.22 (16.43–18.04) | 18.51 (17.74–19.32) | 22.8 (22.15–23.47) | 28.15 (27.22–29.11) |

*Abbreviations: CI, Confidence Interval*

**Supplemental Table 3:** Age-stratified trends in respiratory failure and neurodegenerative disorders - related mortality, shown as crude rate mortality per 100,000 among adults aged ≥65 in the United States, 1999–2024

| Age stratified trends in respiratory failure and neurodegenerative disorders - related mortality, shown as Crude Mortality Rate per 100,000 among adults aged ≥65 in the United States, 1999–2024 | | | |
| --- | --- | --- | --- |
| Crude Mortality Rate (95% CI) | | | |
| **YEAR** | **65-74** **YEAR OLDS** | **75-84 YEARS OLD** | **85+ YEAR OLD** |
| 1999 | 3.71 (3.44–3.99) | 11.2 (10.61–11.79) | 27.71 (26.11–29.31) |
| 2000 | 3.7 (3.42–3.98) | 11.06 (10.47–11.65) | 27.31 (25.74–28.89) |
| 2001 | 3.75 (3.47–4.03) | 11.31 (10.72–11.89) | 29.08 (27.47–30.69) |
| 2002 | 3.57 (3.3–3.85) | 11.12 (10.55–11.7) | 32.02 (30.34–33.7) |
| 2003 | 3.69 (3.41–3.97) | 12.27 (11.66–12.87) | 30.85 (29.23–32.48) |
| 2004 | 3.42 (3.15–3.68) | 11.84 (11.25–12.43) | 35.55 (33.82–37.28) |
| 2005 | 3.71 (3.43–3.98) | 12.21 (11.61–12.81) | 36.29 (34.56–38.01) |
| 2006 | 3.55 (3.28–3.82) | 12.87 (12.26–13.49) | 37.3 (35.58–39.02) |
| 2007 | 3.63 (3.36–3.9) | 13 (12.39–13.62) | 38.83 (37.11–40.55) |
| 2008 | 3.73 (3.47–4) | 14.46 (13.81–15.11) | 46.73 (44.87–48.59) |
| 2009 | 3.66 (3.41–3.92) | 13.56 (12.93–14.19) | 42.98 (41.23–44.74) |
| 2010 | 3.94 (3.68–4.21) | 15.3 (14.63–15.97) | 46.67 (44.87–48.48) |
| 2011 | 3.74 (3.48–3.99) | 15.2 (14.54–15.87) | 46.9 (45.13–48.68) |
| 2012 | 3.94 (3.69–4.2) | 14.75 (14.1–15.41) | 43.81 (42.12–45.5) |
| 2013 | 4.15 (3.9–4.4) | 15.21 (14.55–15.87) | 47.39 (45.66–49.13) |
| 2014 | 4 (3.76–4.24) | 16.04 (15.37–16.71) | 49.8 (48.04–51.57) |
| 2015 | 4.47 (4.22–4.72) | 18.16 (17.45–18.86) | 62.21 (60.26–64.16) |
| 2016 | 4.49 (4.25–4.74) | 19.02 (18.3–19.73) | 67.76 (65.74–69.77) |
| 2017 | 4.85 (4.6–5.11) | 20.28 (19.56–21.01) | 75.56 (73.45–77.68) |
| 2018 | 5.16 (4.9–5.41) | 21.14 (20.41–21.86) | 78.91 (76.75–81.06) |
| 2019 | 5.09 (4.84–5.33) | 19.79 (19.1–20.48) | 71.66 (69.62–73.7) |
| 2020 | 5.45 (5.2–5.71) | 21.87 (21.16–22.58) | 80.88 (78.71–83.04) |
| 2021 | 5.27 (5.02–5.51) | 21.64 (20.92–22.36) | 83.65 (81.34–85.97) |
| 2022 | 5.25 (5–5.49) | 21.93 (21.24–22.63) | 82.92 (80.7–85.13) |
| 2023 | 5.33 (5.08–5.57) | 21.77 (21.1–22.45) | 87.07 (84.75–89.39) |
| 2024 | 5.46 (5.22–5.71) | 23.11 (22.44–23.79) | 27.71 (26.11–29.31) |

*Abbreviations: CI, Confidence Interval*

**Supplemental Table 4:** Urbanization-stratified trends in respiratory failure and neurodegenerative disorders - related mortality, shown as age-adjusted mortality rates per 100,000 among adults aged ≥65 in the United States, 1999–2020

| Urbanization-stratified trends in respiratory failure among neurodegenerative disorders - related mortality, shown as age-adjusted mortality rates per 100,000 among adults aged ≥65 in the United States, 1999–2020 | | |
| --- | --- | --- |
| Age-Adjusted Mortality Rate (95% CI) | | |
| **YEAR** | **METROPOLITAN** | **NON-METROPOLITAN** |
| 1999 | 9.77 (9.4–10.14) | 7.54 (6.88–8.2) |
| 2000 | 9.5 (9.14–9.86) | 8.04 (7.36–8.71) |
| 2001 | 9.73 (9.37–10.09) | 8.83 (8.12–9.54) |
| 2002 | 10.09 (9.72–10.45) | 8.31 (7.63–9) |
| 2003 | 10.29 (9.93–10.66) | 9.15 (8.43–9.86) |
| 2004 | 10.6 (10.23–10.97) | 9.18 (8.46–9.89) |
| 2005 | 11.05 (10.67–11.42) | 9.33 (8.61–10.05) |
| 2006 | 11.35 (10.98–11.73) | 9.41 (8.69–10.12) |
| 2007 | 11.61 (11.24–11.99) | 9.88 (9.15–10.61) |
| 2008 | 13.21 (12.81–13.61) | 11.08 (10.31–11.85) |
| 2009 | 12.43 (12.05–12.81) | 10.16 (9.42–10.89) |
| 2010 | 13.67 (13.28–14.07) | 11.27 (10.5–12.04) |
| 2011 | 13.48 (13.09–13.87) | 11.44 (10.68–12.21) |
| 2012 | 12.95 (12.57–13.33) | 11.61 (10.84–12.38) |
| 2013 | 13.68 (13.3–14.06) | 11.89 (11.12–12.66) |
| 2014 | 14.12 (13.74–14.51) | 12.96 (12.16–13.76) |
| 2015 | 16.67 (16.26–17.08) | 15.09 (14.24–15.94) |
| 2016 | 17.81 (17.39–18.23) | 15.42 (14.57–16.28) |
| 2017 | 19.18 (18.75–19.61) | 18.11 (17.19–19.03) |
| 2018 | 20.09 (19.65–20.52) | 18.72 (17.8–19.64) |
| 2019 | 18.6 (18.19–19.01) | 17.75 (16.86–18.64) |
| 2020 | 20.45 (20.02–20.88) | 20.78 (19.82–21.74) |

*Abbreviations: CI, Confidence Interval*

**Supplemental Table 5:** Race-stratified trends in respiratory failure and neurodegenerative disorders - related mortality, shown as age-adjusted mortality rates per 100,000 among adults aged ≥65 in the United States, 1999–2024

| Race-stratified trends in respiratory failure and neurodegenerative disorders - related mortality, shown as age-adjusted mortality rates per 100,000 among adults aged ≥65 in the United States, 1999–2024 | | | | |
| --- | --- | --- | --- | --- |
| Age-Adjusted Mortality Rate (95% CI) | | | | |
| **Year** | **Asian or Pacific Islander** | **Black or African American** | **White** | **Hispanic or Latino** |
| 1999 | 9.30 (7.02–12.07) | 5.37 (4.49–6.26) | 9.65 (9.30–10.00) | 9.58 (7.92–11.24) |
| 2000 | 6.43 (4.61–8.72) | 5.95 (5.02–6.88) | 9.58 (9.23–9.93) | 9.36 (7.75–10.97) |
| 2001 | 7.02 (5.26–9.18) | 6.13 (5.18–7.07) | 9.96 (9.61–10.32) | 8.90 (7.39–10.42) |
| 2002 | 6.73 (5.01–8.85) | 5.56 (4.67–6.45) | 10.12 (9.76–10.48) | 9.87 (8.30–11.43) |
| 2003 | 7.26 (5.55–9.33) | 7.30 (6.28–8.32) | 10.42 (10.06–10.78) | 9.89 (8.37–11.41) |
| 2004 | 7.29 (5.61–9.30) | 8.81 (7.69–9.93) | 10.59 (10.23–10.95) | 10.33 (8.79–11.86) |
| 2005 | 5.71 (4.29–7.45) | 7.90 (6.85–8.94) | 11.21 (10.84–11.58) | 9.96 (8.51–11.41) |
| 2006 | 8.75 (7.01–10.79) | 8.02 (6.98–9.06) | 11.41 (11.04–11.78) | 10.42 (8.97–11.88) |
| 2007 | 8.71 (7.03–10.67) | 10.34 (9.17–11.51) | 11.47 (11.10–11.84) | 12.18 (10.66–13.71) |
| 2008 | 11.01 (9.07–12.96) | 9.61 (8.50–10.72) | 13.15 (12.76–13.54) | 13.65 (12.08–15.21) |
| 2009 | 9.85 (8.07–11.63) | 9.20 (8.13–10.27) | 12.27 (11.89–12.65) | 13.13 (11.64–14.63) |
| 2010 | 11.05 (9.22–12.88) | 11.09 (9.92–12.25) | 13.54 (13.14–13.93) | 13.06 (11.61–14.50) |
| 2011 | 11.03 (9.27–12.78) | 10.94 (9.80–12.09) | 13.48 (13.09–13.87) | 12.55 (11.18–13.92) |
| 2012 | 10.76 (9.09–12.42) | 10.04 (8.97–11.11) | 13.07 (12.69–13.45) | 12.48 (11.17–13.80) |
| 2013 | 11.73 (10.05–13.41) | 10.36 (9.29–11.43) | 13.75 (13.37–14.14) | 13.86 (12.51–15.20) |
| 2014 | 11.20 (9.63–12.77) | 10.29 (9.25–11.34) | 14.35 (13.96–14.74) | 14.14 (12.82–15.45) |
| 2015 | 12.14 (10.56–13.72) | 12.95 (11.80–14.11) | 16.75 (16.33–17.17) | 18.98 (17.51–20.46) |
| 2016 | 12.94 (11.35–14.53) | 13.41 (12.25–14.57) | 17.82 (17.39–18.25) | 20.27 (18.79–21.75) |
| 2017 | 13.92 (12.33–15.50) | 14.46 (13.29–15.64) | 19.61 (19.17–20.06) | 21.07 (19.60–22.54) |
| 2018 | 12.35 (10.90–13.80) | 14.52 (13.36–15.68) | 20.44 (19.99–20.89) | 23.78 (22.25–25.30) |
| 2019 | 13.91 (12.41–15.41) | 14.19 (13.06–15.31) | 18.95 (18.52–19.37) | 21.66 (20.23–23.09) |
| 2020 | 14.77 (13.27–16.26) | 15.98 (14.80–17.16) | 20.86 (20.42–21.31) | 25.90 (24.38–27.42) |
| 2021 | 16.85 (15.26–18.57) | 15.89 (14.70–17.15) | 21.02 (20.56–21.49) | 26.38 (24.84–27.98) |
| 2022 | 16.22 (14.74–17.82) | 16.84 (15.65–18.10) | 20.90 (20.45–21.35) | 27.40 (25.89–28.99) |
| 2023 | 15.93 (14.48–17.50) | 17.18 (15.99–18.45) | 21.70 (21.24–22.16) | 25.68 (24.22–27.20) |
| 2024 | 17.55 (16.09–19.12) | 16.89 (15.74–18.11) | 22.55 (22.09–23.01) | 27.07 (25.63–28.57) |

*Abbreviations: CI, Confidence Interval*

**Supplemental Table 6:** State- trends in in respiratory failure and neurodegenerative disorders - related mortality, shown as age-adjusted mortality rates per 100,000 among adults aged ≥65 in the United States, 1999–2024

| **State** | **1999-2020** | **2021-2024** |
| --- | --- | --- |
| Alabama | 10.28 (9.75–10.81) | 12.07 (10.9–13.33) |
| Alaska | 9.11 (7.32–11.2) | 9.58 (6.4–13.93) |
| Arizona | 16.87 (16.29–17.45) | 18.27 (17.12–19.48) |
| Arkansas | 36.4 (35.16–37.64) | 89.78 (85.59–94.13) |
| California | 24.58 (24.27–24.89) | 34.2 (33.45–34.96) |
| Colorado | 12.87 (12.23–13.52) | 29.16 (27.27–31.16) |
| Connecticut | 19.99 (19.19–20.78) | 14.37 (12.94–15.92) |
| Delaware | 7.06 (6.07–8.04) | 4.81 (3.35–6.72) |
| District of Columbia | 9.16 (7.67–10.64) | 7.25 (4.69–10.78) |
| Florida | 12.49 (12.24–12.74) | 23.01 (22.33–23.7) |
| Georgia | 23.06 (22.41–23.71) | 31.6 (30.13–33.14) |
| Hawaii | 11.77 (10.78–12.75) | 7.31 (5.87–9.01) |
| Idaho | 18.21 (16.93–19.49) | 36.55 (33.04–40.35) |
| Illinois | 6.6 (6.34–6.86) | 9.13 (8.48–9.81) |
| Indiana | 12.83 (12.33–13.34) | 21.31 (19.91–22.78) |
| Iowa | 10.82 (10.2–11.44) | 21.85 (19.95–23.9) |
| Kansas | 11.85 (11.14–12.57) | 23.14 (21.0–25.43) |
| Kentucky | 11.57 (10.97–12.16) | 16.78 (15.28–18.39) |
| Louisiana | 8.17 (7.66–8.68) | 12.85 (11.52–14.28) |
| Maine | 11.39 (10.43–12.34) | 13.3 (11.23–15.64) |
| Maryland | 4.92 (4.57–5.26) | 17.98 (16.66–19.37) |
| Massachusetts | 14.44 (13.94–14.94) | 19.96 (18.71–21.28) |
| Michigan | 7.72 (7.41–8.03) | 14.63 (13.72–15.59) |
| Minnesota | 6.3 (5.91–6.69) | 14.23 (13.04–15.5) |
| Mississippi | 28.43 (27.27–29.59) | 46.57 (43.4–49.91) |
| Missouri | 12.95 (12.44–13.46) | 20.75 (19.37–22.2) |
| Montana | 9.55 (8.49–10.6) | 26.92 (23.37–30.86) |
| Nebraska | 18.85 (17.75–19.96) | 20.46 (18.01–23.16) |
| Nevada | 11.77 (10.91–12.63) | 27.91 (25.49–30.51) |
| New Hampshire | 13.36 (12.23–14.48) | 24.45 (21.47–27.74) |
| New Jersey | 12 (11.59–12.41) | 21.26 (20.12–22.45) |
| New Mexico | 6.67 (6.01–7.34) | 17.2 (15.1–19.53) |
| New York | 10.35 (10.09–10.6) | 12.82 (12.23–13.43) |
| North Carolina | 9.24 (8.87–9.6) | 10.1 (9.34–10.91) |
| North Dakota | 12.56 (11.15–13.96) | 16.95 (13.53–21.03) |
| Ohio | 14.84 (14.45–15.23) | 23.81 (22.73–24.92) |
| Oklahoma | 14.22 (13.52–14.92) | 15.82 (14.24–17.52) |
| Oregon | 7.92 (7.42–8.42) | 17.81 (16.29–19.44) |
| Pennsylvania | 10.58 (10.28–10.87) | 15.28 (14.5–16.09) |
| Rhode Island | 12.73 (11.59–13.87) | 11.65 (9.36–14.34) |
| South Carolina | 13.11 (12.48–13.73) | 14.32 (13.07–15.67) |
| South Dakota | 11.91 (10.64–13.18) | 24.59 (20.72–29.0) |
| Tennessee | 12.7 (12.18–13.22) | 20.05 (18.71–21.47) |
| Texas | 18.05 (17.69–18.4) | 26.15 (25.3–27.02) |
| Utah | 15.35 (14.31–16.4) | 21.17 (18.78–23.78) |
| Vermont | 14.01 (12.4–15.62) | 27.7 (23.24–32.78) |
| Virginia | 11.27 (10.82–11.72) | 8.73 (7.95–9.57) |
| Washington | 16.49 (15.91–17.08) | 27.58 (26.06–29.16) |
| West Virginia | 10.96 (10.15–11.77) | 7.11 (5.75–8.7) |
| Wisconsin | 5.21 (4.87–5.54) | 10.88 (9.88–11.96) |
| Wyoming | 8.5 (7.03–9.96) | 25.21 (20.26–31.02) |

*Abbreviations: CI, Confidence Interval*

**Supplemental Table 7:** Percentage distribution of place of death due to failure and neurodegenerative disorders - related mortality, in the United States (1999–2024), with mortality highlighted.

| **Place of Death** | **Deaths** | **% of Total Deaths** |
| --- | --- | --- |
| Medical Facility - Inpatient | 35,567 | 27.91% |
| Medical Facility - Outpatient or ER | 2,460 | 1.93% |
| Medical Facility - Dead on Arrival | 173 | 0.14% |
| Medical Facility - Status unknown | 49 | 0.04% |
| Decedent's home | 28,142 | 22.08% |
| Hospice facility | 7,463 | 5.86% |
| Nursing home/long term care | 46,376 | 36.39% |
| Other | 6,836 | 5.36% |
| Place of death unknown | 361 | 0.28% |

**Supplemental Table 8**: Characteristics trends in respiratory failure and neurodegenerative disorders - related mortality,, shown as age-adjusted mortality rates per 100,000 among adults aged ≥65 in the United States, 1999–2024

| **VARIABLE** | **DEATHS (%)** | **AAMR (95% CI)** |
| --- | --- | --- |
| respiratory failure and neurodegenerative disorders | 172089 | 14.56 ( 14.20-14.91) |
| **Sex** | | |
| Female | 93579 | 12.91 (12.49-13.34) |
| Male | 78510 | 16.86 (16.24-17.48) |
| **Race** | | |
| Hispanic or Latino | 14011 | 16.21 (14.73-15.47) |
| Asian or Pacific Islander | 5283 | 11.16 (9.50-12.97) |
| Black or African American | 10791 | 11.12 (10.00-12.22) |
| White | 141094 | 14.94 ( 14.54-15.34) |
| **Urbanization** | | |
| Metropolitan | 106927 | 13.65 (13.26-14.04) |
| Non-Metropolitan | 20500 | 12.08 (11.3-12.86) |
| **Census Region** | | |
| Northeast | 28860 | 12.43 (11.69-13.17) |
| Midwest | 29104 | 11.00 (10.35-11.65) |
| South | 63646 | 14.85 (14.25-15.45) |
| West | 50479 | 19.90 (19.00-20.88) |
